# Supplementary material
Source: Royal Society of Chemistry journal article supplement (doi:10.1039/d6tc01554a)
Supplement: d6tc01554a1.pdf [file d6tc01554a1.pdf]

## **Electronic Supplementary Information (ESI) for:**

### **Hierarchical Thornbush-like Organic Nanostructures via Surface Grafting for High-Performance Multi-level Photomemory Devices**

Hojeong Yu, ‡<sup>a</sup> Inho Song, ‡<sup>b</sup> Sangwook Lee,<sup>a</sup> Ji Hyung Jung,<sup>a</sup> Joon Hak Oh<sup>a</sup>

<sup>a</sup>School of Chemical and Biological Engineering, Institute of Chemical Processes, Seoul National University, 1 Gwanak-ro, Gwanak-gu, Seoul 08826, Republic of Korea.  
E-mail: joonhoh@snu.ac.kr

<sup>b</sup>Department of Chemical Engineering, Chung-Ang University (CAU), Seoul 06974, Republic of Korea.

‡Hojeong Yu and Inho Song equally contributed to this work.

## Supplementary Figures

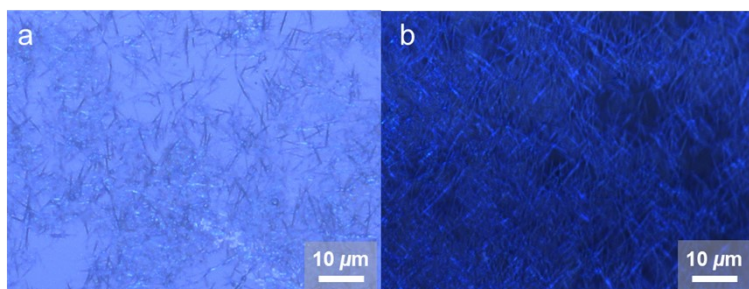

**Figure S1.** (a) A bright-field and (b) a dark-field optical microscope image of pure TCPP MWs fabricated by direct acidification of TCPP in aqueous solution.

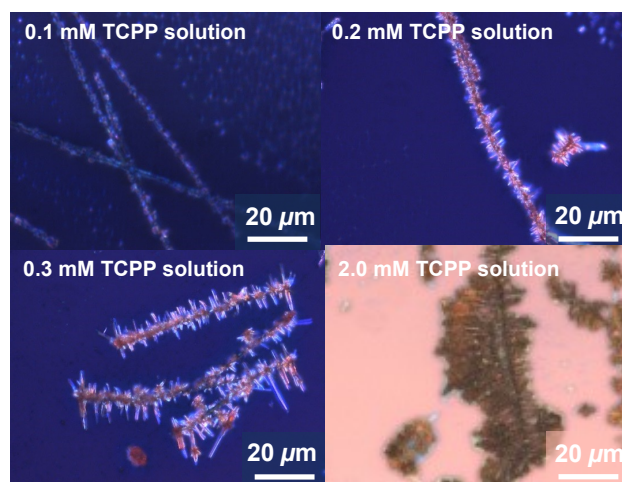

**Figure S2.** Dark-field optical microscope image of TCPP/BPE-PTCDI MWs fabricated with different concentration of TCPP solutions; 0.1 mM, 0.2 mM, 0.3 mM, and 2.0 mM.

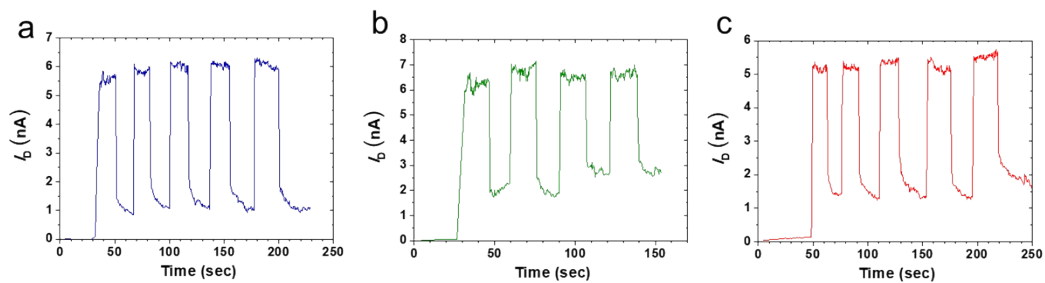

**Figure S3.** The on/off switching of TCPP/BPE-PTCDI MW-FETs ( $W/L=0.049$ ) upon (a) blue light illumination, (b) green light illumination, and (c) red light illumination with optical power density of  $500 \mu\text{Wcm}^{-2}$ . The on/off switching was measured at  $V_{GS} = 0 \text{ V}$  and  $V_{DS} = 80 \text{ V}$ .

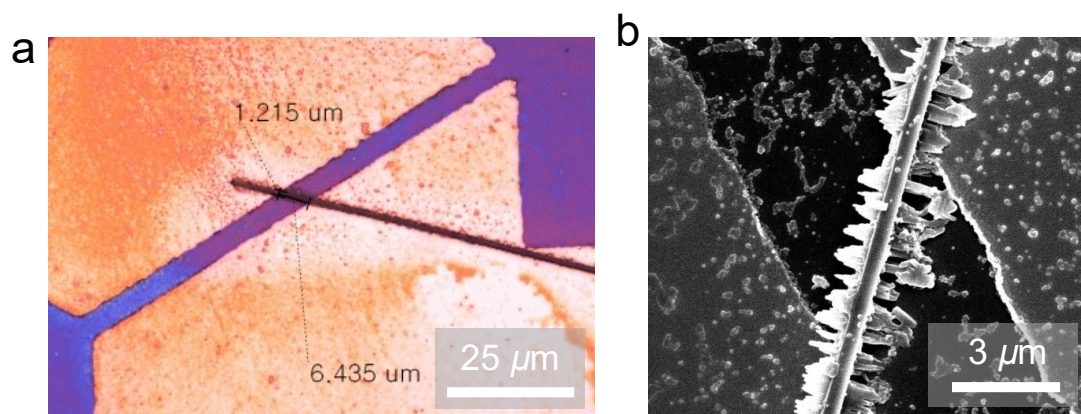

**Figure S4.** (a) An optical microscope image and (b) a SEM image of an actual measured TCPP/ BPE-PTCDI MW device which have the single MW positioned across the source and drain electrodes.

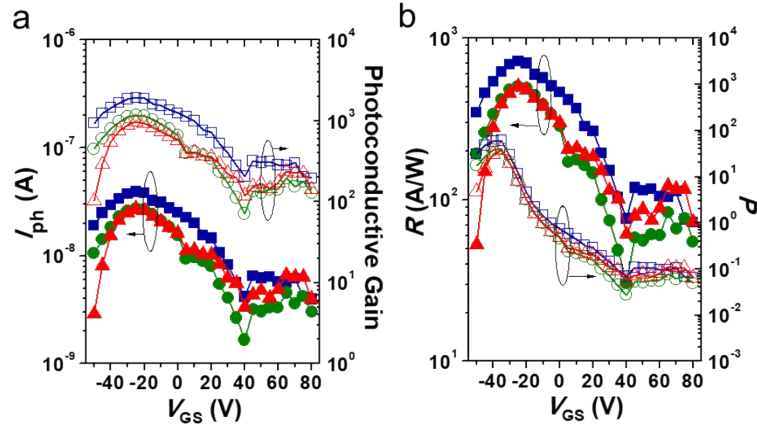

**Figure S5.** (a) Photocurrent and photoconductive gain of a TCPP/BPE-PTCDI MW-OPTs as a function of  $V_{GS}$  (-50 V to 80 V) measured with  $V_{DS} = 80$  V under light illumination; 460 nm (blue), 530 nm (green), 670 nm (red) with optical power density of  $500 \mu\text{Wcm}^{-2}$ . (b) The corresponding light responsivity ( $R$ ) and photocurrent/dark-current ratio ( $P$ ) variations of the device.

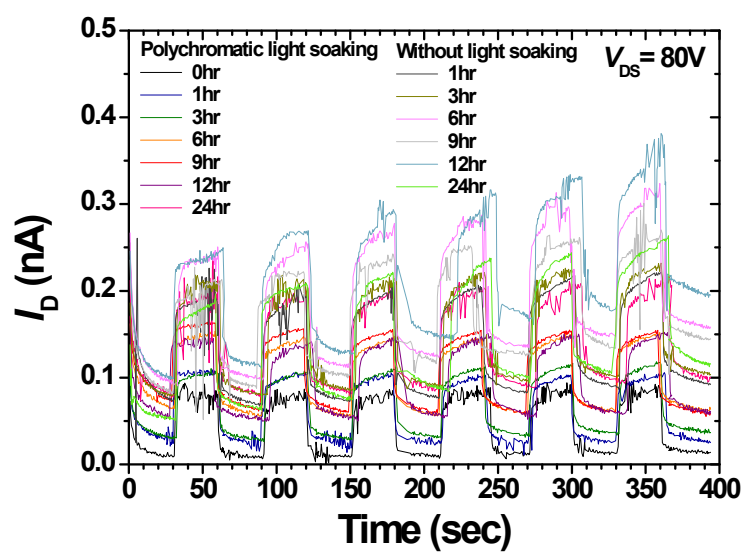

**Figure S6.** The on/off switching of TCPP MW-devices upon polychromatic light soaking and decay treatment. The on/off switching was measured at  $V_{GS} = 0$  V and  $V_{DS} = 80$  V.

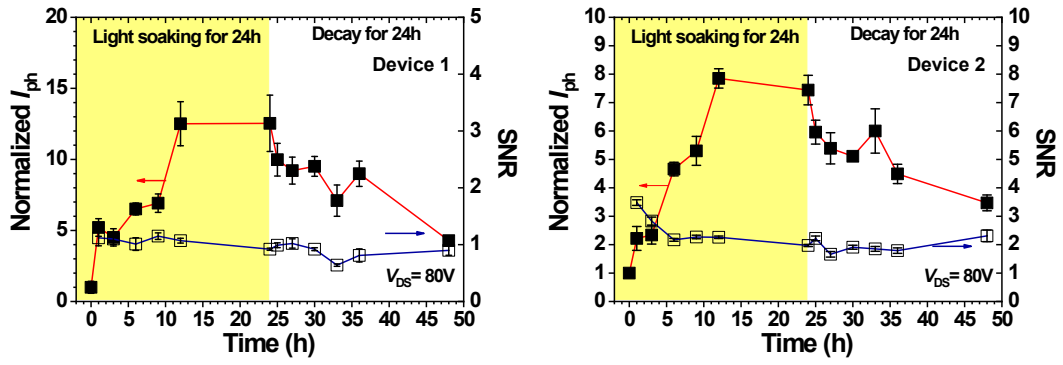

**Figure S7.** Normalized  $I_{ph}$  variations under the polychromatic light soaking and decay treatment and signal to noise ratio (SNR) values obtained from the on/off switching of polychromatic light in two individual devices. The on/off switching was measured at  $V_{GS} = 0$  V and  $V_{DS} = 80$  V. The devices were stored in the dark for light decay treatment. Each data point represents the average value of 5 times of on/off switching.

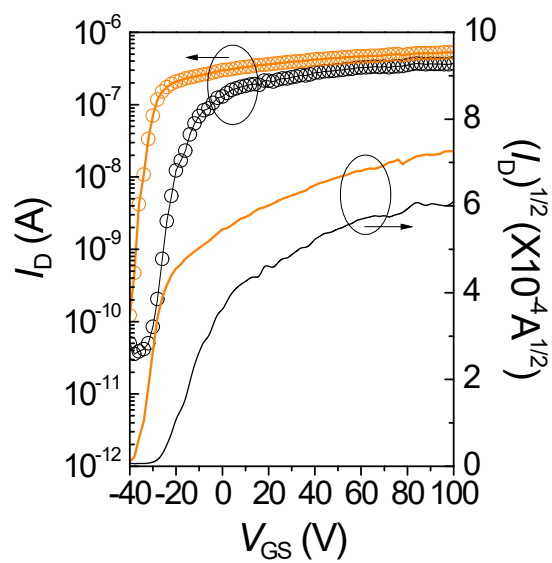

**Figure S8.** The transfer curves of the TCPP/BPE-PTCDI MW-FET for pristine (black) and illuminated (yellow) conditions with reaching extremely high  $\mu_e$  from  $1.4 \text{ cm}^2\text{V}^{-1}\text{s}^{-1}$  up to  $6.1 \text{ cm}^2\text{V}^{-1}\text{s}^{-1}$  at  $V_{DS} = 100 \text{ V}$  ( $W/L = 0.039$ ).

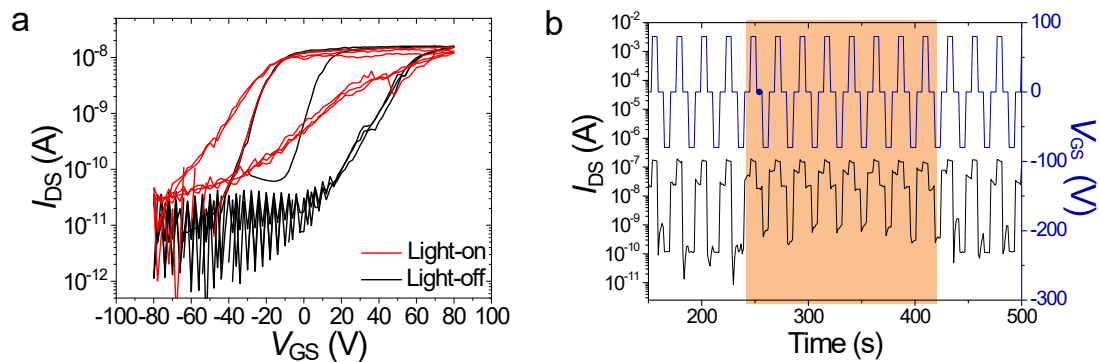

**Figure S9.** Transfer characteristics of (a) pure BPE-PTCDI MW-OPMs, where  $V_{GS} = -80$  and  $80$  V were applied for the programming and erasing procedures, at  $V_{DS} = 40$  V. The red and black lines indicate properties under polychromatic light on ( $15 \text{ mWcm}^{-2}$ ) and off conditions, respectively. (b) Current response to the WRER cycles of the BPE-PTCDI MW-OPMs. The drain current was measured at  $V_{DS} = 40$  V. The writing, reading and erasing were at the gate voltages of  $-80$ ,  $0$ , and  $80$  V, respectively. The red shades indicate polychromatic light on conditions ( $15 \text{ mWcm}^{-2}$ ).
